# Supplementary material for: Transcriptomic Analysis of High- and Low-Virulence Bovine Pasteurella multocida in vitro and in vivo
Source: Front Vet Sci. 2021 Feb 10;8:616774. doi: 10.3389/fvets.2021.616774 (PMC7902865; doi:10.3389/fvets.2021.616774)
Supplement: Supplementary Table 6 — Virulent factors related differentially expressed genes of all groups (P ≤ 0.05). [file Table_6.XLSX]

## Sheet: PmCQ6-VS-PmCQ2-DEGs-UP-VF
CQ6-Gene-ID	CQ2-Gene-ID	Gene Name	Length	PmCQ6-Expression	PmCQ2-Expression	log2FoldChange(PmCQ2/PmCQ6)	FoldChange(PmCQ2/PmCQ6)	Up-Down-Regulation(PmCQ2/PmCQ6)	Padj	Pvalue	type	KEGG Orthology	GO Component	GO Function	GO Process	Blast nr	CQ2-VF
chr_orf00909	CQ2GL000182	hexA	660	338.314	1114.75	1.72028	3.29501	Up	1.48e-15	1.26e-16	known_mRNA	K09689|1|7.3e-123|444.9|pmul:DR93_1617|capsular polysaccharide transport system ATP-binding protein [EC:3.6.3.38]	-	GO:0016887//ATPase activity;GO:0005524//ATP binding	-	gi|492011980|ref|WP_005716581.1|/5.1e-122/ATP-binding protein [Pasteurella multocida]	(bexA) ATP-dependent polysaccharide export protein BexA [Capsule (VF0043)] [Haemophilus influenzae str. 1007]
chr_orf00908	CQ2GL000183	hexB	798	228.111	1060.51	2.21696	4.64911	Up	2.54e-17	1.94e-18	known_mRNA	K09688|1|1.0e-150|537.7|pul:NT08PM_0483|capsular polysaccharide transport system permease protein	GO:0016021//integral component of membrane;GO:0005886//plasma membrane	-	GO:0006810//transport	gi|492121216|ref|WP_005754209.1|/6.9e-150/sugar ABC transporter permease [Pasteurella multocida]	(ctrC) capsule polysaccharide export inner-membrane protein CtrC [Capsule (VF0079)] [Neisseria meningitidis MC58]
chr_orf00907	CQ2GL000184	hexC	972	214.003	1150.95	2.42712	5.3782	Up	5.99e-20	3.9e-21	known_mRNA	K10107|1|1.3e-173|614.0|pmu:PM0779|capsular polysaccharide transport system permease protein	GO:0016021//integral component of membrane;GO:0009276//Gram-negative-bacterium-type cell wall;GO:0005576//extracellular region	GO:0015542//sugar efflux transmembrane transporter activity	GO:0009103//lipopolysaccharide biosynthetic process;GO:0006859;GO:0015992//proton transport	gi|499209309|ref|WP_010906849.1|/9.3e-173/capsule polysaccharide transporter [Pasteurella multocida]	(bexC) capsular polysaccharide export protein BexC [Capsule (VF0043)] [Haemophilus influenzae str. 1007]
chr_orf00906	CQ2GL000185	hexD	1182	265.204	2455.06	3.21059	9.25726	Up	5.32e-38	1.27e-39	known_mRNA	K01991|1|1.4e-220|770.4|pmp:Pmu_08560|polysaccharide biosynthesis/export protein	GO:0016020//membrane	GO:0015159//polysaccharide transmembrane transporter activity	GO:0015774//polysaccharide transport	gi|504092106|ref|WP_014326100.1|/9.4e-220/sugar ABC transporter substrate-binding protein [Pasteurella multocida]	(bexD) capsular polysaccharide export protein BexD [Capsule (VF0043)] [Haemophilus influenzae str. 1007]
chr_orf00904	CQ2GL000187	hyaC	1098	692.652	7985.05	3.5271	11.5282	Up	3.07e-90	7.18e-93	known_mRNA	K00012|1|7.3e-136|488.8|abl:A7H1H_0654|UDPglucose 6-dehydrogenase [EC:1.1.1.22]	-	GO:0051287//NAD binding;GO:0003979//UDP-glucose 6-dehydrogenase activity	GO:0000271//polysaccharide biosynthetic process;GO:0055114//oxidation-reduction process	gi|262092171|gb|ACY25504.1|/1.0e-135/AcbC [Avibacterium paragallinarum]	(wbfV/wcvB) Predicted UDP-glucose 6-dehydrogenase [Capsular polysaccharide (CVF282)] [Vibrio vulnificus CMCP6]
chr_orf00249	CQ2GL000791	wzc	2100	682.778	2065.49	1.59699	3.02512	Up	7.15e-26	3.41e-27	known_mRNA	K16692|1|0.0e+00|1350.5|pmul:DR93_951|tyrosine-protein kinase Etk/Wzc [EC:2.7.10.-]	GO:0016021//integral component of membrane	-	GO:0009103//lipopolysaccharide biosynthetic process;GO:0045226//extracellular polysaccharide biosynthetic process	gi|504091763|ref|WP_014325757.1|/0.0e+00/tyrosine protein kinase [Pasteurella multocida]	(wzc) putative tyrosine-protein kinase Wzc [Capsular polysaccharide (CVF282)] [Vibrio vulnificus YJ016]
chr_orf00250	CQ2GL000790	wzb	444	56.1014	181.527	1.69408	3.2357	Up	4.22e-10	6.38e-11	known_mRNA	K01104|1|3.9e-80|302.4|pmv:PMCN06_0213|protein-tyrosine phosphatase [EC:3.1.3.48]	-	GO:0004725//protein tyrosine phosphatase activity	GO:0035335//peptidyl-tyrosine dephosphorylation	gi|504091764|ref|WP_014325758.1|/2.7e-79/protein-tyrosine-phosphatase [Pasteurella multocida]	(wzb) cytoplasmic phosphatase [Capsular polysaccharide (CVF282)] [Vibrio vulnificus YJ016]
chr_orf00251	CQ2GL000789	wza	1098	367.209	950.052	1.3714	2.58722	Up	2.89e-16	2.32e-17	known_mRNA	K01991|1|1.4e-206|723.8|pmul:DR93_953|polysaccharide biosynthesis/export protein	GO:0016020//membrane	GO:0015159//polysaccharide transmembrane transporter activity	GO:0015774//polysaccharide transport	gi|570281423|gb|AHE63611.1|/9.4e-206/polysaccharide export protein Wza [Pasteurella multocida subsp. multocida str. HB03]	(wza) putative polysaccharide export protein YccZ precursor [Capsular polysaccharide (CVF282)] [Vibrio fischeri ES114]
chr_orf00252	CQ2GL000788	WbiI	1749	322.239	1548.66	2.26482	4.80594	Up	6.82e-32	2.17e-33	known_mRNA	K19421|1|1.4e-104|385.6|gtk:GT3570_16260|polysaccharide biosynthesis protein EpsC	-	-	-	gi|12721346|gb|AAK03099.1|/0.0e+00/Rfb [Pasteurella multocida subsp. multocida str. Pm70]	(ABBFA_003450) epimerase/dehydratase WbiI [Capsule (CVF775)] [Acinetobacter baumannii AB307-0294]
chr_orf00253	CQ2GL000787	spsC	1170	288.397	1500.54	2.37935	5.20303	Up	1.05e-38	2.46e-40	known_mRNA	K13010|1|1.6e-56|225.3|tlt:OCC_01394|perosamine synthetase [EC:2.6.1.102]	-	GO:0008483//transaminase activity	-	gi|504091767|ref|WP_014325761.1|/1.2e-230/aminotransferase [Pasteurella multocida]	(ABBFA_003451) spore coat polysaccharide biosynthesis protein spsC [Capsule (CVF775)] [Acinetobacter baumannii AB307-0294]
chr_orf00256	CQ2GL000784	WeeH	603	73.8195	423.805	2.52133	5.7411	Up	6.4e-30	2.37e-31	known_mRNA	K19428|1|1.3e-65|254.6|gwc:GWCH70_3256|sugar transferase EpsL [EC:2.-.-.-]	-	GO:0016740//transferase activity	-	gi|492115098|ref|WP_005751751.1|/3.1e-110/sugar transferase [Pasteurella multocida]	(ABAYE3808) UDP-galactose phosphate transferase (WeeH) [Capsule (CVF775)] [Acinetobacter baumannii AYE]
chr_orf00258	CQ2GL000782	wecB	1131	181.321	1119.42	2.62614	6.17373	Up	2.71e-43	4.69e-45	known_mRNA	K01791|1|9.8e-176|621.3|pali:A3K91_0728|UDP-N-acetylglucosamine 2-epimerase (non-hydrolysing) [EC:5.1.3.14]	-	GO:0008761//UDP-N-acetylglucosamine 2-epimerase activity	-	gi|492155887|ref|WP_005765522.1|/1.9e-185/UDP-N-acetyl glucosamine 2-epimerase [Pasteurella dagmatis]	(ABTJ_03752) UDP-N-acetylglucosamine 2-epimerase [Capsule (CVF775)] [Acinetobacter baumannii MDR-TJ]
chr_orf00259	CQ2GL000781	WbjC	1122	323.419	1550.03	2.26081	4.79262	Up	3.96e-27	1.71e-28	known_mRNA	K19068|1|3.8e-220|768.8|pmp:Pmu_01530|UDP-2-acetamido-2,6-beta-L-arabino-hexul-4-ose reductase [EC:1.1.1.367]	-	GO:0050662//coenzyme binding;GO:0003824//catalytic activity	-	gi|504091771|ref|WP_014325765.1|/2.6e-219/UDP-2-acetamido-2,6-dideoxy-beta-L-talose 4-dehydrogenase [Pasteurella multocida]	(ABZJ_00088) protein WbjC [Capsule (CVF775)] [Acinetobacter baumannii MDR-ZJ06]
chr_orf00260	CQ2GL000780	fnlA	654	207.958	872.765	2.0693	4.19683	Up	2.02e-27	8.42e-29	known_mRNA	K17716|1|1.1e-118|431.0|pmu:PM1007|UDP-glucose 4-epimerase [EC:5.1.3.2]	-	GO:0003978//UDP-glucose 4-epimerase activity	GO:0009103//lipopolysaccharide biosynthetic process	gi|914297464|ref|WP_050567077.1|/7.5e-118/UDP-glucose 4-epimerase [Pasteurella multocida]	(fnlA) UDP-N-acetylglucosamine 4,6-dehydratase [Capsule (CVF775)] [Acinetobacter baumannii D1279779]
chr_orf00265	CQ2GL000775	VipA	1275	728.765	4878.59	2.74294	6.69433	Up	3.06e-47	4.87e-49	known_mRNA	K02474|1|9.9e-193|677.9|abaa:IX88_02590|UDP-N-acetyl-D-galactosamine dehydrogenase [EC:1.1.1.-]	-	GO:0016628//oxidoreductase activity, acting on the CH-CH group of donors, NAD or NADP as acceptor;GO:0051287//NAD binding;GO:0016616//oxidoreductase activity, acting on the CH-OH group of donors, NAD or NADP as acceptor	GO:0000271//polysaccharide biosynthetic process;GO:0055114//oxidation-reduction process	gi|949791756|ref|WP_057104670.1|/1.1e-192/Vi polysaccharide biosynthesis protein VipA/TviB [Acinetobacter pittii]	(BJAB07104_00090) UDP-N-acetyl-D-mannosaminuronate dehydrogenase [Capsule (CVF775)] [Acinetobacter baumannii BJAB07104]
chr_orf01930	CQ2GL001728	afuC	1089	370.836	3509.04	3.24222	9.46251	Up	2.69e-68	1.77e-70	known_mRNA	K02010|1|6.7e-206|721.5|pmul:DR93_298|iron(III) transport system ATP-binding protein [EC:3.6.3.30]	GO:0043190//ATP-binding cassette (ABC) transporter complex	GO:0016887//ATPase activity;GO:0005524//ATP binding;GO:0016820//hydrolase activity, acting on acid anhydrides, catalyzing transmembrane movement of substances	GO:0055085//transmembrane transport	gi|492122496|ref|WP_005755022.1|/4.6e-205/ABC transporter [Pasteurella multocida]	(afuC) sugar-transport ATP-binding protein ABC transporter SugC [Trehalose-recycling ABC transporter (CVF651)] [Mycobacterium marinum M]
chr_orf00315	CQ2GL000726	fbpC	1050	1076.93	2520.45	1.22676	2.34041	Up	4.98e-15	4.57e-16	known_mRNA	K02010|1|4.6e-196|688.7|pmp:Pmu_02130|iron(III) transport system ATP-binding protein [EC:3.6.3.30]	GO:0043190//ATP-binding cassette (ABC) transporter complex	GO:0005524//ATP binding;GO:0015408	GO:0055085//transmembrane transport;GO:0055072//iron ion homeostasis;GO:0015682//ferric iron transport	gi|504091802|ref|WP_014325796.1|/3.2e-195/Fe(3+) ions import ATP-binding protein FbpC [Pasteurella multocida]	(fbpC) ions import ATP-binding protein FbpC [Mycobacterium intracellulare MOTT-02]
chr_orf01280	CQ2GL001152	pvuE	684	239.968	538.812	1.16694	2.24535	Up	2.02e-09	3.34e-10	known_mRNA	K09998|1|2.2e-122|443.4|pmu:PM0126|arginine transport system permease protein	GO:0016021//integral component of membrane;GO:0005886//plasma membrane	GO:0005215//transporter activity	GO:0006810//transport	gi|492025706|ref|WP_005722723.1|/1.5e-121/arginine transporter permease subunit ArtM [Pasteurella multocida]	(pvuE) iron-dicitrate transporter ATP-binding subunit [vibrioferrin (IA038)] [Vibrio parahaemolyticus RIMD 2210633]
chr_orf01928	CQ2GL001726	malK	1059	651.784	4374.3	2.74659	6.71128	Up	4.28e-51	5.6e-53	known_mRNA	K02010|1|8.2e-201|704.5|pmu:PM1454|iron(III) transport system ATP-binding protein [EC:3.6.3.30]	GO:0043190//ATP-binding cassette (ABC) transporter complex	GO:0016887//ATPase activity;GO:0005524//ATP binding;GO:0016820//hydrolase activity, acting on acid anhydrides, catalyzing transmembrane movement of substances	GO:0055085//transmembrane transport	gi|492015847|ref|WP_005717992.1|/5.7e-200/iron ABC transporter ATP-binding protein [Pasteurella multocida]	(malk) ABC transporter, ATP-binding protein SugC [Trehalose-recycling ABC transporter (CVF651)] [Mycobacterium yongonense 05-1390]
chr_orf00177	CQ2GL000852	manB	1656	8337.44	17988	1.10936	2.15749	Up	1.28e-13	1.38e-14	known_mRNA	K01840|1|0.0e+00|1099.7|pmp:Pmu_00800|phosphomannomutase [EC:5.4.2.8]	-	GO:0000287//magnesium ion binding;GO:0016868//intramolecular transferase activity, phosphotransferases	GO:0005975//carbohydrate metabolic process	gi|499209464|ref|WP_010907004.1|/0.0e+00/phosphomannomutase [Pasteurella multocida]	(manB/yhxB) phosphomannomutase [LOS (CVF494)] [Haemophilus influenzae Rd KW20]
chr_orf00206	CQ2GL000829	luxS	507	368.002	805.209	1.12965	2.18806	Up	6.35e-12	8.11e-13	known_mRNA	K07173|1|2.5e-91|339.7|pmp:Pmu_01050|S-ribosylhomocysteine lyase [EC:4.4.1.21]	-	GO:0005506//iron ion binding;GO:0043768//S-ribosylhomocysteine lyase activity	GO:0009372//quorum sensing	gi|492013659|ref|WP_005717368.1|/1.8e-90/S-ribosylhomocysteine lyase [Pasteurella multocida]	(luxS) S-ribosylhomocysteinase [Autoinducer-2 (CVF628)] [Vibrio parahaemolyticus RIMD 2210633]
chr_orf01698	CQ2GL001522	rfaF	1047	1217.68	2445.21	1.00582	2.00809	Up	1.39e-10	2e-11	known_mRNA	K02843|1|3.9e-163|579.3|hic:NTHIC486_01688|heptosyltransferase II [EC:2.4.-.-]	-	-	-	gi|643674096|ref|WP_025248518.1|/6.6e-201/lipopolysaccharide heptosyltransferase II [Pasteurella multocida]	(rfaF) ADP-heptose--lipooligosaccharide heptosyltransferase II [LOS (CVF494)] [Haemophilus influenzae 86-028NP]
chr_orf01699	CQ2GL001523	rfaC/opsX	966	619.508	1274.79	1.04107	2.05775	Up	4.04e-08	8e-09	known_mRNA	K02841|1|5.4e-183|645.2|pmp:Pmu_14910|heptosyltransferase I [EC:2.4.-.-]	-	GO:0008920//lipopolysaccharide heptosyltransferase activity	GO:0009244//lipopolysaccharide core region biosynthetic process	gi|504092420|ref|WP_014326414.1|/3.7e-182/ADP-heptose--LPS heptosyltransferase [Pasteurella multocida]	(rfaC/opsX) lipopolysaccharide heptosyltransferase I [LOS (CVF494)] [Haemophilus somnus 2336]
chr_orf01252	CQ2GL001132	lpxC	918	9261.87	20787.9	1.16637	2.24446	Up	2.29e-15	2.02e-16	known_mRNA	K02535|1|5.7e-158|562.0|hit:NTHI1312|UDP-3-O-[3-hydroxymyristoyl] N-acetylglucosamine deacetylase [EC:3.5.1.108]	-	GO:0008759//UDP-3-O-[3-hydroxymyristoyl] N-acetylglucosamine deacetylase activity;GO:0046872//metal ion binding;GO:0103117//UDP-3-O-acyl-N-acetylglucosamine deacetylase activity	GO:0009245//lipid A biosynthetic process	gi|980943423|ref|WP_059367128.1|/2.2e-160/UDP-3-O-[3-hydroxymyristoyl] N-acetylglucosamine deacetylase [[Pasteurella] pneumotropica]	(lpxC) UDP-3-O-[3-hydroxymyristoyl] N-acetylglucosamine deacetylase [LOS (CVF494)] [Haemophilus somnus 129PT]
chr_orf00222	CQ2GL000815	lptA	1632	272.365	980.817	1.84844	3.60112	Up	2.45e-15	2.17e-16	known_mRNA	K03760|1|0.0e+00|1100.5|pmul:DR93_927|lipid A ethanolaminephosphotransferase [EC:2.7.8.43]	GO:0016021//integral component of membrane	GO:0008484//sulfuric ester hydrolase activity	GO:0008152//metabolic process	gi|504091747|ref|WP_014325741.1|/0.0e+00/sulfatase [Pasteurella multocida]	(lptA) putative sulfatase [Phosphoethanolamine modification (CVF757)] [Neisseria meningitidis 8013]
chr_orf00548	CQ2GL000519	aatC	696	330.761	667.106	1.01213	2.01688	Up	9.5e-11	1.35e-11	known_mRNA	K02003|1|9.7e-126|454.5|pmul:DR93_1220|putative ABC transport system ATP-binding protein	-	GO:0016887//ATPase activity;GO:0005524//ATP binding	-	gi|401697488|gb|EJS89788.1|/6.7e-125/hypothetical protein AAUPMB_04682 [Pasteurella multocida subsp. multocida str. Anand1_buffalo]	(aatC) ABC transporter ATP-binding protein [ABC transporter for dispersin (CVF737)] [Escherichia coli O44:H18 042]
chr_orf00686	CQ2GL000391	trpD	1002	124.065	289.706	1.22349	2.33511	Up	1.59e-07	3.3e-08	known_mRNA	K00766|1|3.4e-132|476.5|msu:MS1151|anthranilate phosphoribosyltransferase [EC:2.4.2.18]	-	GO:0004048//anthranilate phosphoribosyltransferase activity;GO:0000287//magnesium ion binding	GO:0008652//cellular amino acid biosynthetic process;GO:0000162//tryptophan biosynthetic process	gi|492146689|ref|WP_005762194.1|/2.0e-146/anthranilate phosphoribosyltransferase [Pasteurella dagmatis]	(trpD) anthranilate phosphoribosyltransferase [Tryptophan synthesis (CVF308)] [Mycobacterium tuberculosis CAS/NITR204]
chr_orf00689	CQ2GL000388	mbtI	1551	56.1834	386.541	2.78241	6.88	Up	3.51e-24	1.89e-25	known_mRNA	K01657|1|2.7e-301|1038.9|pmp:Pmu_06510|anthranilate synthase component I [EC:4.1.3.27]	-	GO:0046872//metal ion binding;GO:0004049//anthranilate synthase activity	GO:0008652//cellular amino acid biosynthetic process;GO:0000162//tryptophan biosynthetic process	gi|504092006|ref|WP_014326000.1|/1.9e-300/anthranilate synthase component I [Pasteurella multocida]	(mbtI) anthranilate synthase component I [Mycobactin (CVF315)] [Mycobacterium tuberculosis str. Haarlem/NITR202]
chr_orf00950	CQ2GL000142	purC	861	2154.98	4328.17	1.00608	2.00845	Up	6.83e-12	8.75e-13	known_mRNA	K01923|1|4.7e-162|575.5|pmp:Pmu_08970|phosphoribosylaminoimidazole-succinocarboxamide synthase [EC:6.3.2.6]	-	GO:0004639//phosphoribosylaminoimidazolesuccinocarboxamide synthase activity;GO:0005524//ATP binding	GO:0006189//'de novo' IMP biosynthetic process	gi|504092128|ref|WP_014326122.1|/3.2e-161/phosphoribosylaminoimidazolesuccinocarboxamide synthase [Pasteurella multocida]	(purC) phosphoribosylaminoimidazole-succinocarboxamide synthase [Purine synthesis (CVF306)] [Mycobacterium smegmatis str. MC2 155]
chr_orf01248	CQ2GL001288	ccmB	921	720.005	1595.83	1.14823	2.21642	Up	2.4e-10	3.51e-11	known_mRNA	K00852|1|5.2e-167|592.0|pmp:Pmu_11610|ribokinase [EC:2.7.1.15]	-	GO:0004747//ribokinase activity	GO:0046835//carbohydrate phosphorylation;GO:0006014//D-ribose metabolic process	gi|504092259|ref|WP_014326253.1|/3.6e-166/ribokinase [Pasteurella multocida]	(ccmB) ABC transporter involved in cytochrome c biogenesis, CcmB subunit [Cytochrome c muturation (ccm) locus (CVF358)] [Legionella
chr_orf01803	CQ2GL001611	hopAN1	1242	569.699	1346.87	1.24134	2.36418	Up	2.47e-13	2.73e-14	known_mRNA	K21948|1|4.1e-183|646.0|hia:H733_1429|3-dehydrotetronate 4-kinase [EC:2.7.1.217]	-	-	-	gi|557250625|gb|ESQ72692.1|/2.1e-233/membrane protein [Pasteurella multocida subsp. multocida P1062]	(hopAN1) type III effector HopAN1 [P. syringae TTSS effectors (CVF534)] [Pseudomonas syringae pv. syringae B728a]
chr_orf02223	CQ2GL001983	kdtA	1284	1675.74	3362.31	1.00465	2.00646	Up	6.68e-15	6.19e-16	known_mRNA	K02527|1|1.4e-170|604.4|hsm:HSM_0421|3-deoxy-D-manno-octulosonic-acid transferase [EC:2.4.99.12 2.4.99.13 2.4.99.14 2.4.99.15]	GO:0016021//integral component of membrane	-	-	gi|974661552|ref|WP_059246434.1|/3.0e-243/3-deoxy-D-manno-octulosonic acid transferase [Pasteurella multocida]	(kdtA) Three-deoxy-D-manno-octulosonic-acid transferase domain protein [LOS (CVF494)] [Haemophilus somnus 2336]

## Sheet: PmCQ2-VS-PmCQ2_m-DEGs-UP-VF
CQ2-Gene-ID	Gene name	Length	PMCQ2-Expression	PMCQ2_m-Expression	log2FoldChange(PMCQ2_m/PMCQ2)	FoldChange(PMCQ2_m/PMCQ2)	Up-Down-Regulation(PMCQ2_m/PMCQ2)	Padj	Pvalue	type	KEGG Orthology	GO Component	GO Function	GO Process	Blast nr	CQ2-VF
CQ2GL000182	hexA	660	206.704	859.823	2.05647	4.15968	Up	2.83843e-10	5.71894e-11	known_mRNA	K09689|1|7.3e-123|444.9|pmul:DR93_1617|capsular polysaccharide transport system ATP-binding protein [EC:3.6.3.38]	-	GO:0016887//ATPase activity;GO:0005524//ATP binding	-	gi|492011980|ref|WP_005716581.1|/5.1e-122/ATP-binding protein [Pasteurella multocida]	(bexA) ATP-dependent polysaccharide export protein BexA [Capsule (VF0043)] [Haemophilus influenzae str. 1007]
CQ2GL000183	hexB	798	199.739	852.636	2.09382	4.26876	Up	5.59678e-09	1.29097e-09	known_mRNA	K09688|1|1.0e-150|537.7|pul:NT08PM_0483|capsular polysaccharide transport system permease protein	GO:0016021//integral component of membrane;GO:0005886//plasma membrane	-	GO:0006810//transport	gi|492121216|ref|WP_005754209.1|/6.9e-150/sugar ABC transporter permease [Pasteurella multocida]	(ctrC) capsule polysaccharide export inner-membrane protein CtrC [Capsule (VF0079)] [Neisseria meningitidis MC58]
CQ2GL000184	hexC	972	220.016	1132.93	2.36438	5.1493	Up	4.19007e-10	8.61692e-11	known_mRNA	K10107|1|1.3e-173|614.0|pmu:PM0779|capsular polysaccharide transport system permease protein	GO:0016021//integral component of membrane;GO:0009276//Gram-negative-bacterium-type cell wall;GO:0005576//extracellular region	GO:0015542//sugar efflux transmembrane transporter activity	GO:0009103//lipopolysaccharide biosynthetic process;GO:0006859;GO:0015992//proton transport	gi|499209309|ref|WP_010906849.1|/9.3e-173/capsule polysaccharide transporter [Pasteurella multocida]	(bexC) capsular polysaccharide export protein BexC [Capsule (VF0043)] [Haemophilus influenzae str. 1007]
CQ2GL000185	hexD	1182	462.871	1836.6	1.98836	3.96785	Up	5.38035e-09	1.23108e-09	known_mRNA	K01991|1|1.4e-220|770.4|pmp:Pmu_08560|polysaccharide biosynthesis/export protein	GO:0016020//membrane	GO:0015159//polysaccharide transmembrane transporter activity	GO:0015774//polysaccharide transport	gi|504092106|ref|WP_014326100.1|/9.4e-220/sugar ABC transporter substrate-binding protein [Pasteurella multocida]	(bexD) capsular polysaccharide export protein BexD [Capsule (VF0043)] [Haemophilus influenzae str. 1007]
CQ2GL000186	hyaB	1401	474.496	1400.18	1.56115	2.95089	Up	1.51105e-08	3.67439e-09	known_mRNA	K16698|1|3.2e-19|101.7|bhk:B4U37_19320|teichuronic acid biosynthesis glycosyltransferase TuaG [EC:2.4.-.-]	-	GO:0016740//transferase activity	-	gi|356597032|gb|AET15758.1|/3.0e-273/glycosyl transferase Hyab [Pasteurella multocida 36950]	(hyaB)glycosyl transferase Hyab
CQ2GL000187	hyaC	1173	1684.49	4268.99	1.34159	2.5343	Up	6.0437e-07	1.70758e-07	known_mRNA	K00012|1|1.4e-145|521.2|abl:A7H1H_0654|UDPglucose 6-dehydrogenase [EC:1.1.1.22]	-	GO:0051287//NAD binding;GO:0003979//UDP-glucose 6-dehydrogenase activity	GO:0000271//polysaccharide biosynthetic process;GO:0055114//oxidation-reduction process	gi|262092171|gb|ACY25504.1|/2.3e-146/AcbC [Avibacterium paragallinarum]	(hyaC/wbfV/wcvB) Predicted UDP-glucose 6-dehydrogenase [Capsular polysaccharide (CVF282)] [Vibrio vulnificus CMCP6]
CQ2GL000190	hscA	2058	547.088	1235.12	1.17481	2.25763	Up	2.25132e-06	6.73624e-07	known_mRNA	K07266|1|0.0e+00|1394.4|pmul:DR93_1609|capsular polysaccharide export protein	-	-	-	gi|557249013|gb|ESQ71104.1|/0.0e+00/capsule polysaccharide transporter [Pasteurella multocida subsp. multocida P1062]	(hscA) HscA [Capsule (VF0043)] [Haemophilus influenzae str. 1007]
CQ2GL000191	hscB	1227	145.319	303.879	1.06427	2.09112	Up	2.59662e-05	8.88793e-06	known_mRNA	K07265|1|4.8e-245|851.7|pmp:Pmu_08500|capsular polysaccharide export protein	-	-	GO:0015774//polysaccharide transport;GO:0000271//polysaccharide biosynthetic process	gi|514165598|ref|WP_016533042.1|/3.3e-244/capsule polysaccharide modification protein [Pasteurella multocida]	(hscB) capsular polysaccharide export protein HscB [Capsule (VF0043)] [Haemophilus influenzae str. 1007]
CQ2GL002093	hemB	1026	71.6425	275.388	1.94258	3.84392	Up	5.58425e-15	7.78536e-16	known_mRNA	K01698|1|2.6e-167|593.2|hso:HS_0548|porphobilinogen synthase [EC:4.2.1.24]	-	GO:0046872//metal ion binding;GO:0004655//porphobilinogen synthase activity	GO:0006779//porphyrin-containing compound biosynthetic process	gi|505741053|ref|WP_015702685.1|/1.0e-193/delta-aminolevulinic acid dehydratase [Pasteurella multocida]	(hemB) Porphobilinogen synthase [Heme biosynthesis (CVF506)] [Haemophilus somnus 2336]
CQ2GL000396	hemR	2229	412.627	1883.12	2.19021	4.56373	Up	2.58823e-13	4.15986e-14	known_mRNA	K16087|1|0.0e+00|1532.3|pmul:DR93_1355|hemoglobin/transferrin/lactoferrin receptor protein	GO:0016021//integral component of membrane;GO:0009279//cell outer membrane	GO:0004872//receptor activity;GO:0005215//transporter activity	GO:0006810//transport	gi|643672909|ref|WP_025248456.1|/0.0e+00/TonB-dependent receptor [Pasteurella multocida]	(hemR) hemin receptor [Heme biosynthesis (CVF506)] [Haemophilus influenzae Rd KW20]
CQ2GL000229	hmbR	2385	109.988	621.117	2.49751	5.64711	Up	7.90015e-17	1.01359e-17	known_mRNA	K16087|1|0.0e+00|1595.1|pmp:Pmu_08120|hemoglobin/transferrin/lactoferrin receptor protein	GO:0016021//integral component of membrane;GO:0009279//cell outer membrane	GO:0004872//receptor activity;GO:0005215//transporter activity	GO:0006810//transport	gi|504092084|ref|WP_014326078.1|/0.0e+00/ligand-gated channel protein [Pasteurella multocida]	(hmbR) TonB-dependent hemoglobin receptor [Haemoglobin receptor (CVF198)] [Neisseria meningitidis H44/76]
CQ2GL000629	hhuA	2976	126.809	428.646	1.75713	3.38024	Up	6.52202e-08	1.69168e-08	known_mRNA	K16087|1|0.0e+00|2031.5|pmp:Pmu_04000|hemoglobin/transferrin/lactoferrin receptor protein	GO:0016021//integral component of membrane;GO:0009279//cell outer membrane	GO:0004872//receptor activity;GO:0005215//transporter activity	GO:0006810//transport	gi|512748031|ref|WP_016504246.1|/0.0e+00/TonB-dependent receptor [Pasteurella multocida]	(hhuA) haemoglobin-haptoglobin binding protein HhuA [HhuA (VF0271)] [Haemophilus influenzae TN106]
CQ2GL000564	sitA	882	946.391	8158.58	3.10781	8.62073	Up	1.33071e-78	1.47925e-80	known_mRNA	K11604|1|1.1e-137|494.6|hiu:HIB_04740|manganese/iron transport system substrate-binding protein	-	GO:0046872//metal ion binding	GO:0030001//metal ion transport;GO:0007155//cell adhesion	gi|984390682|gb|KWW09568.1|/3.5e-163/iron-binding protein [Pasteurella multocida]	(sitA) iron ABC transporter, substrate-binding protein [Iron/managanease transport (CVF459)] [Escherichia coli O44:H18 042]
CQ2GL000565	sitB	894	318.168	1571.84	2.30459	4.94029	Up	4.25898e-25	3.70861e-26	known_mRNA	K11607|1|6.6e-135|485.3|aap:NT05HA_0396|manganese/iron transport system ATP-binding protein	-	GO:0016887//ATPase activity;GO:0005524//ATP binding	-	gi|499209085|ref|WP_010906625.1|/2.2e-165/iron ABC transporter permease [Pasteurella multocida]	(sitB) ABC Mn+2/Fe+2 transporter, ATPase subunit SitB [Iron/managanease transport (CVF459)] [Escherichia coli APEC O1]
CQ2GL000613	fur	441	112.341	653.059	2.53932	5.81316	Up	5.54668e-38	2.69755e-39	known_mRNA	K03711|1|2.8e-78|296.2|pmul:DR93_1126|Fur family transcriptional regulator, ferric uptake regulator	-	GO:0046872//metal ion binding;GO:0003700//transcription factor activity, sequence-specific DNA binding;GO:0003677//DNA binding	GO:0006355//regulation of transcription, DNA-templated	gi|492023484|ref|WP_005721511.1|/1.9e-77/transcriptional repressor [Pasteurella multocida]	(fur) transcriptional repressor of iron-responsive genes (Fur family) (ferric uptake regulator) [Fur (VF0113)] [Salmonella enterica subsp. enterica serovar Typhimurium str. LT2]
CQ2GL001241	hitA	1020	1677.87	28302.8	4.07624	16.8683	Up	2.92055e-37	1.44742e-38	known_mRNA	K02012|1|2.0e-164|583.6|hsm:HSM_1250|iron(III) transport system substrate-binding protein	-	GO:0046872//metal ion binding	-	gi|557250988|gb|ESQ73055.1|/8.7e-190/iron ABC transporter substrate-binding protein [Pasteurella multocida subsp. multocida P1062]	(hitA) extracellular solute-binding protein family 1 [Haemophilus iron transport locus (CVF501)] [Haemophilus somnus 2336]
CQ2GL001242	hitB	1659	109.891	1012.58	3.20389	9.21437	Up	1.87361e-31	1.1889e-32	known_mRNA	K02011|1|0.0e+00|1095.5|pmul:DR93_2028|iron(III) transport system permease protein	GO:0016021//integral component of membrane;GO:0005886//plasma membrane	-	GO:0006810//transport	gi|504092327|ref|WP_014326321.1|/0.0e+00/iron ABC transporter permease [Pasteurella multocida]	(hitB) binding-protein-dependent transport systems inner membrane component [Haemophilus iron transport locus (CVF501)] [Haemophilus somnus 2336]
CQ2GL001243	hitC	963	44.4826	372.802	3.0671	8.38086	Up	2.48831e-25	2.12065e-26	known_mRNA	K02010|1|3.3e-180|636.0|pmul:DR93_2029|iron(III) transport system ATP-binding protein [EC:3.6.3.30]	-	GO:0016887//ATPase activity;GO:0005524//ATP binding	GO:0006810//transport	gi|504092328|ref|WP_014326322.1|/2.3e-179/ABC transporter [Pasteurella multocida]	(hitC) iron(III) ABC transporter, ATP-binding protein [Haemophilus iron transport locus (CVF501)] [Haemophilus somnus 129PT]
CQ2GL001149	pvuB	897	134.996	628.14	2.21817	4.65303	Up	8.53636e-44	3.32123e-45	known_mRNA	K02016|1|5.8e-163|578.6|pmv:PMCN06_1172|iron complex transport system substrate-binding protein	-	-	-	gi|492019874|ref|WP_005720199.1|/4.0e-162/iron siderophore-binding protein [Pasteurella multocida]	(pvuB) iron-dicitrate transporter substrate-binding subunit [vibrioferrin (IA038)] [Vibrio parahaemolyticus RIMD 2210633]
CQ2GL001267	ccmF	1926	70.7677	174.319	1.30057	2.46326	Up	3.58738e-09	7.95904e-10	known_mRNA	K04016|1|5.0e-265|918.7|msu:MS1815|cytochrome c-type biogenesis protein NrfE	GO:0016021//integral component of membrane	GO:0020037//heme binding;GO:0015232//heme transporter activity;GO:0016829//lyase activity	GO:0017004//cytochrome complex assembly;GO:0015886//heme transport	gi|499208896|ref|WP_010906436.1|/0.0e+00/heme lyase subunit CcmF [Pasteurella multocida]	(ccmF) cytochrome C-type biogenesis protein CcmF [Cytochrome c muturation (ccm) locus (CVF358)] [Legionella longbeachae NSW150]
CQ2GL000857	hutC	945	71.1884	142.423	1.00047	2.00064	Up	0.000244643	9.59763e-05	known_mRNA	K02015|1|1.2e-171|607.4|pmp:Pmu_00760|iron complex transport system permease protein	GO:0016021//integral component of membrane;GO:0005886//plasma membrane	GO:0005215//transporter activity	GO:0006810//transport	gi|504091726|ref|WP_014325720.1|/8.4e-171/hemin ABC transporter permease [Pasteurella multocida]	(hutC) hemin ABC transporter, permease protein [direct heme uptake system (IA054)] [Bartonella quintana str. Toulouse]
CQ2GL000666	hutX	492	32.4845	306.589	3.23848	9.43802	Up	1.66524e-16	2.16736e-17	known_mRNA	K07227|1|5.7e-88|328.6|pmul:DR93_1074|heme iron utilization protein	-	-	-	gi|504091845|ref|WP_014325839.1|/3.9e-87/heme iron utilization protein [Pasteurella multocida]	(hutX) heme iron utilization protein [direct heme uptake system (IA062)] [Aeromonas salmonicida subsp. salmonicida A449]
CQ2GL000665	hutZ	516	30.6696	403.207	3.71664	13.1468	Up	2.90447e-17	3.5919e-18	known_mRNA	K07226|1|2.6e-91|339.7|pmul:DR93_1075|heme iron utilization protein	-	GO:0004733//pyridoxamine-phosphate oxidase activity;GO:0010181//FMN binding	GO:0042823//pyridoxal phosphate biosynthetic process;GO:0055114//oxidation-reduction process	gi|492113663|ref|WP_005751227.1|/1.8e-90/heme utilization protein HutZ [Pasteurella multocida]	(hutZ) heme iron utilization protein [direct heme uptake system (IA062)] [Aeromonas salmonicida subsp. salmonicida A449]
CQ2GL001251	hugZ	555	17.8088	1062.39	5.89858	59.6552	Up	3.33117e-74	4.16589e-76	known_mRNA	K07226|1|6.2e-99|365.2|pmul:DR93_2037|heme iron utilization protein	-	GO:0004733//pyridoxamine-phosphate oxidase activity;GO:0010181//FMN binding	GO:0042823//pyridoxal phosphate biosynthetic process;GO:0055114//oxidation-reduction process	gi|643673814|ref|WP_025248507.1|/1.3e-99/pyridoxamine 5'-phosphate oxidase [Pasteurella multocida]	(hugZ) heme iron utilization protein [direct heme uptake system (IA062)] [Aeromonas salmonicida subsp. salmonicida A449]
CQ2GL000664	hgpB	2904	473.296	1873.91	1.98524	3.95928	Up	3.91858e-23	3.72075e-24	known_mRNA	K16087|1|0.0e+00|1974.1|pmp:Pmu_03660|hemoglobin/transferrin/lactoferrin receptor protein	GO:0016021//integral component of membrane;GO:0009279//cell outer membrane	GO:0004872//receptor activity;GO:0005215//transporter activity	GO:0006810//transport	gi|504091846|ref|WP_014325840.1|/0.0e+00/ligand-gated channel protein [Pasteurella multocida]	(hgpB) hemoglobin-binding protein [Hemoglobin and hemoglobin-haptoglobin binding proteins (Hgps) (CVF505)] [Haemophilus influenzae Rd KW20]
CQ2GL000177	ompA	1047	20453.3	46043.6	1.17067	2.25116	Up	8.79639e-09	2.08196e-09	known_mRNA	K03286|1|1.2e-196|690.6|pmp:Pmu_08640|OmpA-OmpF porin, OOP family	GO:0016021//integral component of membrane;GO:0009279//cell outer membrane	GO:0005198//structural molecule activity	-	gi|380701840|gb|AFD95748.1|/8.4e-196/outer membrane protein A [Pasteurella multocida]	(ompP5) OmpA domain protein transmembrane region-containing protein [P5 protein (CVF492)] [Haemophilus somnus 2336]
CQ2GL000386	ompP5	819	531.846	1455.68	1.45261	2.73703	Up	1.92039e-11	3.54903e-12	known_mRNA	K03286|1|3.3e-32|144.1|btrh:F543_16680|OmpA-OmpF porin, OOP family	GO:0016021//integral component of membrane;GO:0009279//cell outer membrane	-	-	gi|492033366|ref|WP_005726415.1|/2.5e-155/plastocyanin [Pasteurella multocida]	(ompP5) Outer membrane protein P5 [P5 protein (CVF492)] [Haemophilus influenzae PittEE]
CQ2GL001449	acpP/acpXL	231	189.209	598.34	1.66099	3.16233	Up	6.11003e-08	1.57633e-08	known_mRNA	K02078|1|1.4e-33|146.7|pmu:PM1917|acyl carrier protein	GO:0005737//cytoplasm	GO:0000036//ACP phosphopantetheine attachment site binding involved in fatty acid biosynthetic process	GO:0006633//fatty acid biosynthetic process	gi|492030044|ref|WP_005725021.1|/1.0e-32/MULTISPECIES: acyl carrier protein [Pasteurella]	(acpXL) acyl carrier protein [LPS (CVF383)] [Brucella melitensis bv. 1 str. 16M]
CQ2GL001321	lpxD	1029	269.08	587.706	1.12706	2.18414	Up	8.64866e-06	2.76404e-06	known_mRNA	K02536|1|8.9e-168|594.7|aah:CF65_00610|UDP-3-O-[3-hydroxymyristoyl] glucosamine N-acyltransferase [EC:2.3.1.191]	-	GO:0016410//N-acyltransferase activity	GO:0009245//lipid A biosynthetic process	gi|492030188|ref|WP_005725095.1|/3.6e-191/UDP-3-O-(3-hydroxymyristoyl)glucosamine N-acyltransferase [Pasteurella multocida]	(lpxD) UDP-3-O-[3-hydroxymyristoyl] glucosamine N-acyltransferase [LOS (CVF494)] [Haemophilus influenzae 86-028NP]
CQ2GL001158	lpcA/gmhA	612	215.795	445.385	1.0454	2.06393	Up	8.83338e-07	2.53668e-07	known_mRNA	K03271|1|7.8e-111|404.8|pmp:Pmu_11910|D-sedoheptulose 7-phosphate isomerase [EC:5.3.1.28]	GO:0005737//cytoplasm	GO:0030246//carbohydrate binding;GO:0008968//D-sedoheptulose 7-phosphate isomerase activity;GO:0008270//zinc ion binding	GO:2001061;GO:0009244//lipopolysaccharide core region biosynthetic process	gi|356597357|gb|AET16083.1|/5.4e-110/phosphoheptose isomerase [Pasteurella multocida 36950]	(gmhA/lpcA) phosphoheptose isomerase [LOS (CVF494)] [Haemophilus influenzae 86-028NP]
CQ2GL001230	ibpB/HD1155	1722	104.805	312.9	1.57799	2.98554	Up	6.03366e-07	1.70194e-07	known_mRNA	K07326|1|0.0e+00|1137.9|pmp:Pmu_12620|hemolysin activation/secretion protein	-	-	GO:0015031//protein transport	gi|504092319|ref|WP_014326313.1|/0.0e+00/transporter [Pasteurella multocida]	(HD1155) large supernatant protein exporter [LspA1-LspB (SS121)] [Haemophilus ducreyi 35000HP]
CQ2GL000016	lex2B	669	189.041	781.019	2.04666	4.13148	Up	4.60435e-14	6.9737e-15	known_mRNA	K07270|1|4.3e-123|445.7|pmp:Pmu_00150|glycosyl transferase, family 25	-	GO:0016740//transferase activity	-	gi|492130216|ref|WP_005757279.1|/3.0e-122/beta-1,4-galactosyltransferase [Pasteurella multocida]	(lex2B) lipooligosaccharide galactosyltransferase I [LOS (CVF494)] [Haemophilus ducreyi 35000HP]
CQ2GL000151	argK	1005	331.217	2077.62	2.64908	6.27268	Up	1.22348e-24	1.08237e-25	known_mRNA	K00611|1|3.0e-168|596.3|gan:UMN179_01020|ornithine carbamoyltransferase [EC:2.1.3.3]	GO:0005737//cytoplasm	GO:0004585//ornithine carbamoyltransferase activity;GO:0016597//amino acid binding	GO:0019546//arginine deiminase pathway;GO:0019547//arginine catabolic process to ornithine	gi|736603247|ref|WP_034611948.1|/1.3e-169/ornithine carbamoyltransferase [Chelonobacter oris]	(argK) phaseolotoxin-insensitive ornithine carbamoyltransferase [Phytotoxin phaseolotoxin (CVF546)] [Pseudomonas syringae pv. phaseolicola 1448A]
CQ2GL000165	ahpC	603	1644.29	4045.85	1.29897	2.46054	Up	1.04134e-08	2.4888e-09	known_mRNA	K03386|1|4.1e-112|409.1|pmul:DR93_1635|peroxiredoxin (alkyl hydroperoxide reductase subunit C) [EC:1.11.1.15]	-	GO:0051920//peroxiredoxin activity;GO:0004601//peroxidase activity	GO:0098869//cellular oxidant detoxification;GO:0055114//oxidation-reduction process	gi|492012034|ref|WP_005716614.1|/2.8e-111/peroxiredoxin [Pasteurella multocida]	(ahpC) peroxiredoxin ycf42 [AhpC (CVF322)] [Mycobacterium indicus pranii MTCC 9506]
CQ2GL000202	rimP/CbuK_0601	456	36.5845	167.281	2.19296	4.57244	Up	2.88448e-12	5.0101e-13	known_mRNA	K09748|1|9.0e-80|301.2|pmu:PM0761|ribosome maturation factor RimP	GO:0005737//cytoplasm	-	GO:0042274//ribosomal small subunit biogenesis	gi|557249001|gb|ESQ71092.1|/6.2e-79/ribosome maturation protein RimP [Pasteurella multocida subsp. multocida P1062]	(CbuK_0601) hypothetical protein [T4SS effectors (CVF803)] [Coxiella burnetii CbuK_Q154]
CQ2GL000306	aroF/VVA1298	1053	51.6826	277.102	2.42267	5.36162	Up	3.67258e-13	5.93668e-14	known_mRNA	K01626|1|6.1e-156|555.4|asu:Asuc_1570|3-deoxy-7-phosphoheptulonate synthase [EC:2.5.1.54]	-	GO:0003849//3-deoxy-7-phosphoheptulonate synthase activity	GO:0008652//cellular amino acid biosynthetic process;GO:0009423//chorismate biosynthetic process;GO:0009073//aromatic amino acid family biosynthetic process	gi|896209779|ref|WP_049214379.1|/1.2e-173/phospho-2-dehydro-3-deoxyheptonate aldolase [Pasteurella multocida]	(VVA1298) phospho-2-dehydro-3-deoxyheptonate aldolase [vulnibactin (IA023)] [Vibrio vulnificus YJ016]
CQ2GL000388	mbtI	1551	72.0699	203.647	1.4986	2.82569	Up	6.0892e-05	2.19426e-05	known_mRNA	K01657|1|2.7e-301|1038.9|pmp:Pmu_06510|anthranilate synthase component I [EC:4.1.3.27]	-	GO:0046872//metal ion binding;GO:0004049//anthranilate synthase activity	GO:0008652//cellular amino acid biosynthetic process;GO:0000162//tryptophan biosynthetic process	gi|504092006|ref|WP_014326000.1|/1.9e-300/anthranilate synthase component I [Pasteurella multocida]	(mbtI) anthranilate synthase component I [Mycobactin (CVF315)] [Mycobacterium tuberculosis str. Haarlem/NITR202]
CQ2GL000504	wecA	1074	96.9407	283.726	1.54932	2.9268	Up	9.3814e-10	1.99013e-10	known_mRNA	K02851|1|1.9e-176|623.6|hpr:PARA_17320|UDP-GlcNAc:undecaprenyl-phosphate/decaprenyl-phosphate GlcNAc-1-phosphate transferase [EC:2.7.8.33 2.7.8.35]	GO:0009276//Gram-negative-bacterium-type cell wall;GO:0005887//integral component of plasma membrane	GO:0008963//phospho-N-acetylmuramoyl-pentapeptide-transferase activity;GO:0030145//manganese ion binding;GO:0000287//magnesium ion binding;GO:0016757//transferase activity, transferring glycosyl groups;GO:0036380	GO:0071555//cell wall organization;GO:0044038//cell wall macromolecule biosynthetic process;GO:0009243//O antigen biosynthetic process	gi|492114005|ref|WP_005751351.1|/1.5e-200/undecaprenyl-phosphate alpha-N-acetylglucosaminyl 1-phosphate transferase [Pasteurella multocida]	(wecA) PII uridylyl-transferase [LOS (CVF494)] [Haemophilus influenzae PittEE]
CQ2GL000535	lisR	696	37.6006	155.656	2.04954	4.13973	Up	0.000384742	0.00015575	known_mRNA	K07657|1|5.2e-127|458.8|pmp:Pmu_04930|two-component system, OmpR family, phosphate regulon response regulator PhoB	GO:0005622//intracellular	GO:0000156//phosphorelay response regulator activity;GO:0003677//DNA binding	GO:0000160//phosphorelay signal transduction system;GO:0006355//regulation of transcription, DNA-templated;GO:0006817//phosphate ion transport	gi|492120807|ref|WP_005753800.1|/3.6e-126/DNA-binding response regulator [Pasteurella multocida]	(lisR) two-component response regulator [LisR/LisK (CVF253)] [Listeria monocytogenes EGD-e]
CQ2GL000675	plr/gapA	1005	2161.27	5199.42	1.26647	2.40573	Up	1.32659e-06	3.89561e-07	known_mRNA	K00134|1|2.1e-177|626.7|aeu:ACEE_02605|glyceraldehyde 3-phosphate dehydrogenase [EC:1.2.1.12]	-	GO:0051287//NAD binding;GO:0016620//oxidoreductase activity, acting on the aldehyde or oxo group of donors, NAD or NADP as acceptor;GO:0050661//NADP binding	GO:0006006//glucose metabolic process;GO:0055114//oxidation-reduction process	gi|810414715|ref|WP_046338782.1|/7.3e-181/type I glyceraldehyde-3-phosphate dehydrogenase [Pasteurella multocida]	(plr/gapA) glyceraldehyde-3-phosphate dehydrogenase, type I [Streptococcal plasmin receptor/GAPDH (CVF123)] [Streptococcus pneumoniae D39]
CQ2GL001006	sugC	1113	111.863	1105.76	3.30522	9.88488	Up	3.28703e-62	5.93767e-64	known_mRNA	K11072|1|5.1e-177|625.5|hsm:HSM_1574|spermidine/putrescine transport system ATP-binding protein [EC:3.6.3.31]	GO:0043190//ATP-binding cassette (ABC) transporter complex	GO:0015595;GO:0005524//ATP binding;GO:0015594//putrescine-importing ATPase activity	GO:0015847//putrescine transport;GO:1903711//spermidine transmembrane transport	gi|12720494|gb|AAK02348.1|/1.9e-206/PotA [Pasteurella multocida subsp. multocida str. Pm70]	(sugC) sugar ABC transporter ATP-binding protein SugC [Trehalose-recycling ABC transporter (CVF651)] [Mycobacterium abscessus subsp. bolletii 50594]
CQ2GL001450	flmH	729	341.689	722.148	1.07961	2.11347	Up	5.2469e-05	1.86643e-05	known_mRNA	K00059|1|1.5e-108|397.5|btre:F542_18050|3-oxoacyl-[acyl-carrier protein] reductase [EC:1.1.1.100]	-	GO:0004316//3-oxoacyl-[acyl-carrier-protein] reductase (NADPH) activity;GO:0051287//NAD binding	GO:0006633//fatty acid biosynthetic process;GO:0055114//oxidation-reduction process	gi|492125224|ref|WP_005755541.1|/2.3e-128/beta-ketoacyl-ACP reductase [Pasteurella multocida]	(flmH) 3-oxoacyl-ACP reductase [Polar flagella (VF0473)] [Aeromonas hydrophila ML09-119]
CQ2GL001495	eno	1302	950.143	3837.81	2.01407	4.03919	Up	8.57441e-20	9.57124e-21	known_mRNA	K01689|1|7.4e-228|794.7|msu:MS0256|enolase [EC:4.2.1.11]	GO:0000015//phosphopyruvate hydratase complex;GO:0009986//cell surface;GO:0005576//extracellular region	GO:0000287//magnesium ion binding;GO:0004634//phosphopyruvate hydratase activity	GO:0006096//glycolytic process	gi|492029921|ref|WP_005724946.1|/3.1e-240/enolase [Pasteurella multocida]	(eno) phosphopyruvate hydratase [Streptococcal enolase (CVF153)] [Streptococcus pneumoniae D39]
CQ2GL001603	tuf/tufA	1185	4874.25	17557.8	1.84886	3.60215	Up	2.35719e-23	2.20543e-24	known_mRNA	K02358|1|3.7e-226|788.9|pmv:PMCN06_2025|elongation factor Tu	GO:0005737//cytoplasm	GO:0003746//translation elongation factor activity;GO:0005525//GTP binding;GO:0003924//GTPase activity	GO:0006414//translational elongation	gi|696425201|ref|WP_032994968.1|/4.1e-223/elongation factor Tu, partial [Aggregatibacter aphrophilus]	(tuf) Elongation factor Tu [EF-Tu (CVF587)] [Mycoplasma synoviae 53]
CQ2GL002037	tuf/tufA	1185	4870.18	15415.1	1.66229	3.1652	Up	4.70788e-40	2.11517e-41	known_mRNA	K02358|1|1.1e-225|787.3|pmp:Pmu_15880|elongation factor Tu	GO:0005737//cytoplasm	GO:0003746//translation elongation factor activity;GO:0005525//GTP binding;GO:0003924//GTPase activity	GO:0006414//translational elongation	gi|696425201|ref|WP_032994968.1|/4.1e-223/elongation factor Tu, partial [Aggregatibacter aphrophilus]	(tuf) Elongation factor Tu [EF-Tu (CVF587)] [Mycoplasma synoviae 53]
CQ2GL002055	IlpA	831	350.726	5969.97	4.08931	17.0218	Up	1.36401e-59	2.65347e-61	known_mRNA	K02073|1|7.2e-152|541.6|pmp:Pmu_20400|D-methionine transport system substrate-binding protein	GO:0009279//cell outer membrane	-	GO:0006865//amino acid transport	gi|505741037|ref|WP_015702669.1|/5.0e-151/methionine ABC transporter substrate-binding protein [Pasteurella multocida]

## Sheet: PmCQ6-VS-PmCQ6_m-DEGs-UP-VF
CQ6-Gene-ID	CQ2-Gene-ID	Gene name	Length	PmCQ6-Expression	PmCQ6_M-Expression	log2FoldChange(PmCQ6_M/PmCQ6)	FoldChange(PmCQ6_M/PmCQ6)	Up-Down-Regulation(PmCQ6_M/PmCQ6)	Padj	Pvalue	type	KEGG Orthology	GO Component	GO Function	GO Process	Blast nr	CQ2-VF
chr_orf00909	CQ2GL000182	hexA	660	44.2269	169.198	1.93572	3.82569	Up	3.17567e-13	4.3751e-14	known_mRNA	K09689|1|7.3e-123|444.9|pmul:DR93_1617|capsular polysaccharide transport system ATP-binding protein [EC:3.6.3.38]	-	GO:0016887//ATPase activity;GO:0005524//ATP binding	-	gi|492011980|ref|WP_005716581.1|/5.1e-122/ATP-binding protein [Pasteurella multocida]	(bexA) ATP-dependent polysaccharide export protein BexA [Capsule (VF0043)] [Haemophilus influenzae str. 1007]
chr_orf00908	CQ2GL000183	hexB	798	29.2671	122.461	2.06496	4.18423	Up	6.40299e-12	9.42145e-13	known_mRNA	K09688|1|1.0e-150|537.7|pul:NT08PM_0483|capsular polysaccharide transport system permease protein	GO:0016021//integral component of membrane;GO:0005886//plasma membrane	-	GO:0006810//transport	gi|492121216|ref|WP_005754209.1|/6.9e-150/sugar ABC transporter permease [Pasteurella multocida]	(ctrC) capsule polysaccharide export inner-membrane protein CtrC [Capsule (VF0079)] [Neisseria meningitidis MC58]
chr_orf00907	CQ2GL000184	hexC	972	28.0153	191.139	2.77034	6.82269	Up	6.86857e-28	4.46719e-29	known_mRNA	K10107|1|1.3e-173|614.0|pmu:PM0779|capsular polysaccharide transport system permease protein	GO:0016021//integral component of membrane;GO:0009276//Gram-negative-bacterium-type cell wall;GO:0005576//extracellular region	GO:0015542//sugar efflux transmembrane transporter activity	GO:0009103//lipopolysaccharide biosynthetic process;GO:0006859;GO:0015992//proton transport	gi|499209309|ref|WP_010906849.1|/9.3e-173/capsule polysaccharide transporter [Pasteurella multocida]	(bexC) capsular polysaccharide export protein BexC [Capsule (VF0043)] [Haemophilus influenzae str. 1007]
chr_orf00906	CQ2GL000185	hexD	1182	33.3486	376.415	3.49663	11.2873	Up	4.98341e-34	2.21848e-35	known_mRNA	K01991|1|1.4e-220|770.4|pmp:Pmu_08560|polysaccharide biosynthesis/export protein	GO:0016020//membrane	GO:0015159//polysaccharide transmembrane transporter activity	GO:0015774//polysaccharide transport	gi|504092106|ref|WP_014326100.1|/9.4e-220/sugar ABC transporter substrate-binding protein [Pasteurella multocida]	(bexD) capsular polysaccharide export protein BexD [Capsule (VF0043)] [Haemophilus influenzae str. 1007]
chr_orf00905	CQ2GL000186	hyaB	1434	47.8747	182.805	1.93297	3.81841	Up	2.94554e-07	6.55637e-08	known_mRNA	K16698|1|3.3e-19|101.7|bhk:B4U37_19320|teichuronic acid biosynthesis glycosyltransferase TuaG [EC:2.4.-.-]	-	GO:0016740//transferase activity	-	gi|356597032|gb|AET15758.1|/1.3e-279/glycosyl transferase Hyab [Pasteurella multocida 36950]	(hyaB)glycosyl transferase Hyab
chr_orf00904	CQ2GL000187	hyaC	1098	87.5332	457.248	2.38507	5.22371	Up	4.72113e-21	4.35831e-22	known_mRNA	K00012|1|7.3e-136|488.8|abl:A7H1H_0654|UDPglucose 6-dehydrogenase [EC:1.1.1.22]	-	GO:0051287//NAD binding;GO:0003979//UDP-glucose 6-dehydrogenase activity	GO:0000271//polysaccharide biosynthetic process;GO:0055114//oxidation-reduction process	gi|262092171|gb|ACY25504.1|/1.0e-135/AcbC [Avibacterium paragallinarum]	(hyaC/wbfV/wcvB) Predicted UDP-glucose 6-dehydrogenase [Capsular polysaccharide (CVF282)] [Vibrio vulnificus CMCP6]
chr_orf01139	CQ2GL001030	oppF	981	98.3651	197.372	1.0047	2.00653	Up	9.76182e-06	2.68976e-06	known_mRNA	K12372|1|5.0e-184|648.7|pmp:Pmu_10660|dipeptide transport system ATP-binding protein	-	GO:0016887//ATPase activity;GO:0005524//ATP binding	GO:0015833//peptide transport	gi|492027893|ref|WP_005724065.1|/3.4e-183/peptide ABC transporter ATP-binding protein [Pasteurella multocida]	(oppF) oligopeptide ABC transporter, permease component [Capsule (CVF591)] [Mycoplasma mycoides subsp. mycoides SC str. PG1]
chr_orf00241	CQ2GL000789	wza	594	134.485	412.861	1.61821	3.06994	Up	7.21422e-24	5.81465e-25	known_mRNA	-	GO:0016021//integral component of membrane	GO:0015288//porin activity;GO:0016740//transferase activity	GO:0055085//transmembrane transport	gi|504480743|ref|WP_014667845.1|/1.3e-108/acetylglucosamine transferase [Pasteurella multocida]	(wza) putative polysaccharide export protein YccZ precursor [Capsular polysaccharide (CVF282)] [Vibrio fischeri ES114]
chr_orf00418	CQ2GL000629	hhuA	2976	66.4896	147.685	1.15132	2.22117	Up	5.47915e-05	1.67404e-05	known_mRNA	K16087|1|0.0e+00|2031.5|pmp:Pmu_04000|hemoglobin/transferrin/lactoferrin receptor protein	GO:0016021//integral component of membrane;GO:0009279//cell outer membrane	GO:0004872//receptor activity;GO:0005215//transporter activity	GO:0006810//transport	gi|512748031|ref|WP_016504246.1|/0.0e+00/TonB-dependent receptor [Pasteurella multocida]	(hhuA) haemoglobin-haptoglobin binding protein HhuA [HhuA (VF0271)] [Haemophilus influenzae TN106]
chr_orf00681	CQ2GL000396	hemR	2229	200.93	654.818	1.7044	3.25893	Up	2.24007e-11	3.47453e-12	known_mRNA	K16087|1|0.0e+00|1532.3|pmul:DR93_1355|hemoglobin/transferrin/lactoferrin receptor protein	GO:0016021//integral component of membrane;GO:0009279//cell outer membrane	GO:0004872//receptor activity;GO:0005215//transporter activity	GO:0006810//transport	gi|643672909|ref|WP_025248456.1|/0.0e+00/TonB-dependent receptor [Pasteurella multocida]	(hemR) hemin receptor [Heme biosynthesis (CVF506)] [Haemophilus influenzae Rd KW20]
chr_orf01273	CQ2GL001149	pvuB	897	106.196	249.999	1.23519	2.35413	Up	6.47562e-07	1.48994e-07	known_mRNA	K02016|1|5.8e-163|578.6|pmv:PMCN06_1172|iron complex transport system substrate-binding protein	-	-	-	gi|492019874|ref|WP_005720199.1|/4.0e-162/iron siderophore-binding protein [Pasteurella multocida]	(pvuB) iron-dicitrate transporter substrate-binding subunit [vibrioferrin (IA038)] [Vibrio parahaemolyticus RIMD 2210633]
chr_orf01370	CQ2GL001241	hitA	1014	865.669	11876.3	3.77813	13.7193	Up	1.35739e-109	1.14494e-111	known_mRNA	K02012|1|2.0e-164|583.6|hsm:HSM_1250|iron(III) transport system substrate-binding protein	-	GO:0046872//metal ion binding	-	gi|557250988|gb|ESQ73055.1|/7.4e-189/iron ABC transporter substrate-binding protein [Pasteurella multocida subsp. multocida P1062]	(hitA) extracellular solute-binding protein family 1 [Haemophilus iron transport locus (CVF501)] [Haemophilus somnus 2336]
chr_orf00496	CQ2GL000564	sitA	882	1577.06	4534.93	1.52384	2.87555	Up	3.19548e-15	3.83338e-16	known_mRNA	K11604|1|1.1e-137|494.6|hiu:HIB_04740|manganese/iron transport system substrate-binding protein	-	GO:0046872//metal ion binding	GO:0030001//metal ion transport;GO:0007155//cell adhesion	gi|984390682|gb|KWW09568.1|/3.5e-163/iron-binding protein [Pasteurella multocida]	(sitA) iron ABC transporter, substrate-binding protein [Iron/managanease transport (CVF459)] [Escherichia coli O44:H18 042]
chr_orf01371	CQ2GL001242	hitB	1659	47.6323	433.901	3.18735	9.10938	Up	3.19241e-67	5.38551e-69	known_mRNA	K02011|1|0.0e+00|1095.5|pmul:DR93_2028|iron(III) transport system permease protein	GO:0016021//integral component of membrane;GO:0005886//plasma membrane	-	GO:0006810//transport	gi|504092327|ref|WP_014326321.1|/0.0e+00/iron ABC transporter permease [Pasteurella multocida]	(hitB) binding-protein-dependent transport systems inner membrane component [Haemophilus iron transport locus (CVF501)] [Haemophilus somnus 2336]
chr_orf01372	CQ2GL001243	hitC	1038	20.8504	214.829	3.36504	10.3033	Up	7.0648e-51	1.82082e-52	known_mRNA	K02010|1|1.1e-194|684.1|pmp:Pmu_12730|iron(III) transport system ATP-binding protein [EC:3.6.3.30]	-	GO:0016887//ATPase activity;GO:0005524//ATP binding	GO:0006810//transport	gi|504092328|ref|WP_014326322.1|/7.8e-194/ABC transporter [Pasteurella multocida]	(hitC) iron(III) ABC transporter, ATP-binding protein [Haemophilus iron transport locus (CVF501)] [Haemophilus somnus 129PT]
chr_orf00439	CQ2GL000613	fur	441	75.4141	361.645	2.26167	4.79545	Up	3.03488e-33	1.40793e-34	known_mRNA	K03711|1|2.8e-78|296.2|pmul:DR93_1126|Fur family transcriptional regulator, ferric uptake regulator	-	GO:0046872//metal ion binding;GO:0003700//transcription factor activity, sequence-specific DNA binding;GO:0003677//DNA binding	GO:0006355//regulation of transcription, DNA-templated	gi|492023484|ref|WP_005721511.1|/1.9e-77/transcriptional repressor [Pasteurella multocida]	(fur) transcriptional repressor of iron-responsive genes (Fur family) (ferric uptake regulator) [Fur (VF0113)] [Salmonella enterica subsp. enterica serovar Typhimurium str.
chr_orf00372	CQ2GL000665	hutZ	516	29.9156	230.341	2.9448	7.6997	Up	4.60769e-17	5.0093e-18	known_mRNA	K07226|1|2.6e-91|339.7|pmul:DR93_1075|heme iron utilization protein	-	GO:0004733//pyridoxamine-phosphate oxidase activity;GO:0010181//FMN binding	GO:0042823//pyridoxal phosphate biosynthetic process;GO:0055114//oxidation-reduction process	gi|492113663|ref|WP_005751227.1|/1.8e-90/heme utilization protein HutZ [Pasteurella multocida]	(hutZ) heme iron utilization protein [direct heme uptake system (IA062)] [Aeromonas salmonicida subsp. salmonicida A449]
chr_orf00371	CQ2GL000666	hutX	492	29.5468	162.61	2.46035	5.5035	Up	1.3337e-23	1.10621e-24	known_mRNA	K07227|1|5.7e-88|328.6|pmul:DR93_1074|heme iron utilization protein	-	-	-	gi|504091845|ref|WP_014325839.1|/3.9e-87/heme iron utilization protein [Pasteurella multocida]	(hutX) heme iron utilization protein [direct heme uptake system (IA062)] [Aeromonas salmonicida subsp. salmonicida A449]
chr_orf00917	CQ2GL000177	ompA	1047	13809.2	28914.8	1.06618	2.09388	Up	3.91792e-23	3.35979e-24	known_mRNA	K03286|1|1.2e-196|690.6|pmp:Pmu_08640|OmpA-OmpF porin, OOP family	GO:0016021//integral component of membrane;GO:0009279//cell outer membrane	GO:0005198//structural molecule activity	-	gi|380701840|gb|AFD95748.1|/8.4e-196/outer membrane protein A [Pasteurella multocida]	(ompP5) OmpA domain protein transmembrane region-containing protein [P5 protein (CVF492)] [Haemophilus somnus 2336]
chr_orf00691	CQ2GL000386	ompP5	819	277.824	610.959	1.1369	2.19909	Up	1.36046e-11	2.05917e-12	known_mRNA	K03286|1|3.3e-32|144.1|btrh:F543_16680|OmpA-OmpF porin, OOP family	GO:0016021//integral component of membrane;GO:0009279//cell outer membrane	-	-	gi|492033366|ref|WP_005726415.1|/2.5e-155/plastocyanin [Pasteurella multocida]	(ompP5) Outer membrane protein P5 [P5 protein (CVF492)] [Haemophilus influenzae PittEE]
chr_orf00222	CQ2GL000815	lptA	1632	32.4699	146.115	2.16993	4.50001	Up	6.16003e-15	7.53405e-16	known_mRNA	K03760|1|0.0e+00|1100.5|pmul:DR93_927|lipid A ethanolaminephosphotransferase [EC:2.7.8.43]	GO:0016021//integral component of membrane	GO:0008484//sulfuric ester hydrolase activity	GO:0008152//metabolic process	gi|504091747|ref|WP_014325741.1|/0.0e+00/sulfatase [Pasteurella multocida]	(lptA) putative sulfatase [Phosphoethanolamine modification (CVF757)] [Neisseria meningitidis 8013]
chr_orf01360	CQ2GL001230	ibpB/HD1155	1722	58.6963	203.474	1.7935	3.46656	Up	1.99447e-17	2.10289e-18	known_mRNA	K07326|1|0.0e+00|1137.9|pmp:Pmu_12620|hemolysin activation/secretion protein	-	-	GO:0015031//protein transport	gi|504092319|ref|WP_014326313.1|/0.0e+00/transporter [Pasteurella multocida]	(HD1155) large supernatant protein exporter [LspA1-LspB (SS121)] [Haemophilus ducreyi 35000HP]
chr_orf00528	CQ2GL000535	lisR	696	21.385	91.9884	2.10485	4.30154	Up	5.12663e-12	7.47133e-13	known_mRNA	K07657|1|5.2e-127|458.8|pmul:DR93_1204|two-component system, OmpR family, phosphate regulon response regulator PhoB	GO:0005622//intracellular	GO:0000156//phosphorelay response regulator activity;GO:0003677//DNA binding	GO:0000160//phosphorelay signal transduction system;GO:0006355//regulation of transcription, DNA-templated;GO:0006817//phosphate ion transport	gi|492120807|ref|WP_005753800.1|/3.6e-126/DNA-binding response regulator [Pasteurella multocida]	(lisR) two-component response regulator [LisR/LisK (CVF253)] [Listeria monocytogenes EGD-e]
chr_orf00358	CQ2GL000675	plr/gapA	1005	1162.91	3351.97	1.52727	2.8824	Up	1.11249e-29	6.43223e-31	known_mRNA	K00134|1|2.1e-177|626.7|aeu:ACEE_02605|glyceraldehyde 3-phosphate dehydrogenase [EC:1.2.1.12]	-	GO:0051287//NAD binding;GO:0016620//oxidoreductase activity, acting on the aldehyde or oxo group of donors, NAD or NADP as acceptor;GO:0050661//NADP binding	GO:0006006//glucose metabolic process;GO:0055114//oxidation-reduction process		(plr/gapA) glyceraldehyde-3-phosphate dehydrogenase, type I [Streptococcal plasmin receptor/GAPDH (CVF123)] [Streptococcus pneumoniae D39]
chr_orf00686	CQ2GL000391	trpD	1002	14.9402	110.006	2.88032	7.36312	Up	2.56946e-13	3.51031e-14	known_mRNA	K00766|1|3.4e-132|476.5|msu:MS1151|anthranilate phosphoribosyltransferase [EC:2.4.2.18]	-	GO:0004048//anthranilate phosphoribosyltransferase activity;GO:0000287//magnesium ion binding	GO:0008652//cellular amino acid biosynthetic process;GO:0000162//tryptophan biosynthetic process	gi|492146689|ref|WP_005762194.1|/2.0e-146/anthranilate phosphoribosyltransferase [Pasteurella dagmatis]	(trpD) anthranilate phosphoribosyltransferase [Tryptophan synthesis (CVF308)] [Mycobacterium tuberculosis CAS/NITR204]
chr_orf00689	CQ2GL000388	mbtI	1551	6.5146	125.061	4.26281	19.1971	Up	3.32661e-41	1.18473e-42	known_mRNA	K01657|1|2.7e-301|1038.9|pmp:Pmu_06510|anthranilate synthase component I [EC:4.1.3.27]	-	GO:0046872//metal ion binding;GO:0004049//anthranilate synthase activity	GO:0008652//cellular amino acid biosynthetic process;GO:0000162//tryptophan biosynthetic process	gi|504092006|ref|WP_014326000.1|/1.9e-300/anthranilate synthase component I [Pasteurella multocida]	(mbtI) anthranilate synthase component I [Mycobactin (CVF315)] [Mycobacterium tuberculosis str. Haarlem/NITR202]
chr_orf00776	CQ2GL000306	aroF	1053	23.7403	339.342	3.83733	14.2939	Up	3.00018e-77	4.63945e-79	known_mRNA	K01626|1|6.1e-156|555.4|asu:Asuc_1570|3-deoxy-7-phosphoheptulonate synthase [EC:2.5.1.54]	-	GO:0003849//3-deoxy-7-phosphoheptulonate synthase activity	GO:0008652//cellular amino acid biosynthetic process;GO:0009423//chorismate biosynthetic process;GO:0009073//aromatic amino acid family biosynthetic process	gi|896209779|ref|WP_049214379.1|/1.2e-173/phospho-2-dehydro-3-deoxyheptonate aldolase [Pasteurella multocida]	(VVA1298) phospho-2-dehydro-3-deoxyheptonate aldolase [vulnibactin (IA023)] [Vibrio vulnificus YJ016]
chr_orf00888	CQ2GL000202	rimP/CbuK_0601	456	12.4188	97.8807	2.9785	7.88168	Up	6.68748e-27	4.4813e-28	known_mRNA	K09748|1|9.0e-80|301.2|pmu:PM0761|ribosome maturation factor RimP	GO:0005737//cytoplasm	-	GO:0042274//ribosomal small subunit biogenesis	gi|557249001|gb|ESQ71092.1|/6.2e-79/ribosome maturation protein RimP [Pasteurella multocida subsp. multocida P1062]	(CbuK_0601) hypothetical protein [T4SS effectors (CVF803)] [Coxiella burnetii CbuK_Q154]
chr_orf00929	CQ2GL000165	ahpC	603	1344.65	2855.58	1.08655	2.12366	Up	4.29671e-10	7.69139e-11	known_mRNA	K03386|1|4.1e-112|409.1|pmul:DR93_1635|peroxiredoxin (alkyl hydroperoxide reductase subunit C) [EC:1.11.1.15]	-	GO:0051920//peroxiredoxin activity;GO:0004601//peroxidase activity	GO:0098869//cellular oxidant detoxification;GO:0055114//oxidation-reduction process	gi|492012034|ref|WP_005716614.1|/2.8e-111/peroxiredoxin [Pasteurella multocida]	(ahpC) peroxiredoxin ycf42 [AhpC (CVF322)] [Mycobacterium indicus pranii MTCC 9506]
chr_orf00941	CQ2GL000151	argK	1005	142.017	1140.28	3.00525	8.02917	Up	1.10269e-95	1.18847e-97	known_mRNA	K00611|1|3.0e-168|596.3|gan:UMN179_01020|ornithine carbamoyltransferase [EC:2.1.3.3]	GO:0005737//cytoplasm	GO:0004585//ornithine carbamoyltransferase activity;GO:0016597//amino acid binding	GO:0019546//arginine deiminase pathway;GO:0019547//arginine catabolic process to ornithine	gi|736603247|ref|WP_034611948.1|/1.3e-169/ornithine carbamoyltransferase [Chelonobacter oris]	(argK) phaseolotoxin-insensitive ornithine carbamoyltransferase [Phytotoxin phaseolotoxin (CVF546)] [Pseudomonas syringae pv. phaseolicola 1448A]
chr_orf00950	CQ2GL000142	purC	861	273.739	679.874	1.31247	2.48366	Up	2.63716e-13	3.62084e-14	known_mRNA	K01923|1|4.7e-162|575.5|pmp:Pmu_08970|phosphoribosylaminoimidazole-succinocarboxamide synthase [EC:6.3.2.6]	-	GO:0004639//phosphoribosylaminoimidazolesuccinocarboxamide synthase activity;GO:0005524//ATP binding	GO:0006189//'de novo' IMP biosynthetic process	gi|504092128|ref|WP_014326122.1|/3.2e-161/phosphoribosylaminoimidazolesuccinocarboxamide synthase [Pasteurella multocida]	(purC) phosphoribosylaminoimidazole-succinocarboxamide synthase [Purine synthesis (CVF306)] [Mycobacterium smegmatis str. MC2 155]
chr_orf01113	CQ2GL001006	sugC	1113	105.922	559.03	2.39992	5.27774	Up	1.10547e-29	6.31996e-31	known_mRNA	K11072|1|5.1e-177|625.5|hsm:HSM_1574|spermidine/putrescine transport system ATP-binding protein [EC:3.6.3.31]	GO:0043190//ATP-binding cassette (ABC) transporter complex	GO:0015595;GO:0005524//ATP binding;GO:0015594//putrescine-importing ATPase activity	GO:0015847//putrescine transport;GO:1903711//spermidine transmembrane transport	gi|12720494|gb|AAK02348.1|/1.9e-206/PotA [Pasteurella multocida subsp. multocida str. Pm70]	(sugC) sugar ABC transporter ATP-binding protein SugC [Trehalose-recycling ABC transporter (CVF651)] [Mycobacterium abscessus subsp. bolletii 50594]
chr_orf01499	CQ2GL001357	leuD	606	37.004	77.1505	1.06	2.08493	Up	0.0021235	0.00085378	known_mRNA	K01704|1|5.7e-98|362.1|btrh:F543_14680|3-isopropylmalate/(R)-2-methylmalate dehydratase small subunit [EC:4.2.1.33 4.2.1.35]	GO:0009316//3-isopropylmalate dehydratase complex	GO:0003861//3-isopropylmalate dehydratase activity;GO:0016853//isomerase activity	GO:0009082//branched-chain amino acid biosynthetic process;GO:0009098//leucine biosynthetic process	gi|504092378|ref|WP_014326372.1|/1.5e-112/3-isopropylmalate dehydratase small subunit [Pasteurella multocida]	(leuD) 3-isopropylmalate dehydratase, small subunit [Leucine synthesis (CVF309)] [Mycobacterium smegmatis str. MC2 155]
chr_orf01633	CQ2GL001468	mip	633	103.624	300.96	1.53822	2.90436	Up	1.25972e-16	1.39313e-17	known_mRNA	K03773|1|7.3e-112|408.3|pmu:PM1898|FKBP-type peptidyl-prolyl cis-trans isomerase FklB [EC:5.2.1.8]	-	GO:0003755//peptidyl-prolyl cis-trans isomerase activity	GO:0006457//protein folding;GO:0000413//protein peptidyl-prolyl isomerization	gi|492029989|ref|WP_005724987.1|/5.0e-111/peptidyl-prolyl cis-trans isomerase [Pasteurella multocida]	(mip) macrophage infectivity potentiator [Mip (CVF349)] [Legionella pneumophila str. Lens]
chr_orf01666	CQ2GL001495	eno	1302	490.871	1825.96	1.89524	3.71984	Up	2.40735e-23	2.03056e-24	known_mRNA	K01689|1|7.4e-228|794.7|msu:MS0256|enolase [EC:4.2.1.11]	GO:0000015//phosphopyruvate hydratase complex;GO:0009986//cell surface;GO:0005576//extracellular region	GO:0000287//magnesium ion binding;GO:0004634//phosphopyruvate hydratase activity	GO:0006096//glycolytic process	gi|492029921|ref|WP_005724946.1|/3.1e-240/enolase [Pasteurella multocida]	(eno) phosphopyruvate hydratase [Streptococcal enolase (CVF153)] [Streptococcus pneumoniae D39]
chr_orf02144	CQ2GL001908	ygeA/CFF8240_1412	693	14.6813	43.4924	1.56678	2.96244	Up	7.31915e-05	2.30138e-05	known_mRNA	K01779|1|1.5e-65|254.6|vbr:A6E01_08745|aspartate racemase [EC:5.1.1.13]	-	GO:0036361//racemase activity, acting on amino acids and derivatives	GO:0006520//cellular amino acid metabolic process	gi|492116236|ref|WP_005752168.1|/3.0e-125/racemase [Pasteurella multocida]	(CFF8240_1412) aspartate racemase [LOS (CVF396)] [Campylobacter fetus subsp. fetus 82-40]
chr_orf02204	CQ2GL001964	galU	888	526.635	1081.5	1.03816	2.05361	Up	3.01849e-11	4.78093e-12	known_mRNA	K00963|1|3.8e-143|512.7|hik:HifGL_000487|UTP--glucose-1-phosphate uridylyltransferase [EC:2.7.7.9]	-	GO:0003983//UTP:glucose-1-phosphate uridylyltransferase activity	GO:0006011//UDP-glucose metabolic process;GO:0009058//biosynthetic process	gi|492027660|ref|WP_005723833.1|/6.7e-162/UTP--glucose-1-phosphate uridylyltransferase [Pasteurella multocida]	(galU) carbon storage regulator [LOS (CVF494)] [Haemophilus influenzae PittEE]
chr_orf02302	CQ2GL002055	IlpA	831	434.218	5617.21	3.69336	12.9364	Up	5.43114e-76	8.65317e-78	known_mRNA	K02073|1|7.2e-152|541.6|pmp:Pmu_20400|D-methionine transport system substrate-binding protein	GO:0009279//cell outer membrane	-	GO:0006865//amino acid transport	gi|505741037|ref|WP_015702669.1|/5.0e-151/methionine ABC transporter substrate-binding protein [Pasteurella multocida]	(IlpA) immunogenic lipoprotein A [IlpA (VF0513)] [Vibrio vulnificus YJ016]

## Sheet: PmCQ6_m-VS-PmCQ2_m-DEGs-UP-VF
CQ6-Gene-ID	CQ2-Gene-ID	gene name	Length	PmCQ6_M-Expression	PmCQ2_M-Expression	log2FoldChange(PmCQ2_M/PmCQ6_M)	FoldChange(PmCQ2_M/PmCQ6_M)	Up-Down-Regulation(PmCQ2_M/PmCQ6_M)	Padj	Pvalue	type	KEGG Orthology	GO Component	GO Function	GO Process	Blast nr	CQ2-VF
chr_orf00909	CQ2GL000182	hexA	660	32.7331	108.689	1.73139	3.32048	Up	1.81938e-06	2.59048e-08	known_mRNA	K09689|1|7.3e-123|444.9|pmul:DR93_1617|capsular polysaccharide transport system ATP-binding protein [EC:3.6.3.38]	-	GO:0016887//ATPase activity;GO:0005524//ATP binding	-	gi|492011980|ref|WP_005716581.1|/5.1e-122/ATP-binding protein [Pasteurella multocida]	(bexA) ATP-dependent polysaccharide export protein BexA [Capsule (VF0043)] [Haemophilus influenzae str. 1007]/		(bexA) ATP-dependent polysaccharide export protein BexA [Capsule (VF0043)] [Haemophilus influenzae str. 1007]
chr_orf00908	CQ2GL000183	hexB	798	24.2634	108.297	2.15814	4.46338	Up	6.49419e-10	4.62329e-12	known_mRNA	K09688|1|1.0e-150|537.7|pul:NT08PM_0483|capsular polysaccharide transport system permease protein	GO:0016021//integral component of membrane;GO:0005886//plasma membrane	-	GO:0006810//transport	gi|492121216|ref|WP_005754209.1|/6.9e-150/sugar ABC transporter permease [Pasteurella multocida]	(ctrC) capsule polysaccharide export inner-membrane protein CtrC [Capsule (VF0079)] [Neisseria meningitidis MC58]
chr_orf00907	CQ2GL000184	hexC	972	37.5631	145.109	1.94975	3.86307	Up	1.84339e-08	1.74978e-10	known_mRNA	K10107|1|1.3e-173|614.0|pmu:PM0779|capsular polysaccharide transport system permease protein	GO:0016021//integral component of membrane;GO:0009276//Gram-negative-bacterium-type cell wall;GO:0005576//extracellular region	GO:0015542//sugar efflux transmembrane transporter activity	GO:0009103//lipopolysaccharide biosynthetic process;GO:0006859;GO:0015992//proton transport	gi|499209309|ref|WP_010906849.1|/9.3e-173/capsule polysaccharide transporter [Pasteurella multocida]	(bexC) capsular polysaccharide export protein BexC [Capsule (VF0043)] [Haemophilus influenzae str. 1007]
chr_orf00906	CQ2GL000185	hexD	1182	72.5905	233.724	1.68695	3.21976	Up	1.02314e-07	1.21398e-09	known_mRNA	K01991|1|1.4e-220|770.4|pmp:Pmu_08560|polysaccharide biosynthesis/export protein	GO:0016020//membrane	GO:0015159//polysaccharide transmembrane transporter activity	GO:0015774//polysaccharide transport	gi|504092106|ref|WP_014326100.1|/9.4e-220/sugar ABC transporter substrate-binding protein [Pasteurella multocida]	(bexD) capsular polysaccharide export protein BexD [Capsule (VF0043)] [Haemophilus influenzae str. 1007]
chr_orf00905	CQ2GL000186	hyaB	1434	36.891	186.202	2.33553	5.04737	Up	1.32008e-10	6.26522e-13	known_mRNA	K16698|1|3.3e-19|101.7|bhk:B4U37_19320|teichuronic acid biosynthesis glycosyltransferase TuaG [EC:2.4.-.-]	-	GO:0016740//transferase activity	-	gi|356597032|gb|AET15758.1|/1.3e-279/glycosyl transferase Hyab [Pasteurella multocida 36950]	(hyaB)glycosyl transferase Hyab
chr_orf00904	CQ2GL000187	hyaC	1098	91.0503	498.392	2.45254	5.4738	Up	1.1602e-17	2.20257e-20	known_mRNA	K00012|1|7.3e-136|488.8|abl:A7H1H_0654|UDPglucose 6-dehydrogenase [EC:1.1.1.22]	-	GO:0051287//NAD binding;GO:0003979//UDP-glucose 6-dehydrogenase activity	GO:0000271//polysaccharide biosynthetic process;GO:0055114//oxidation-reduction process	gi|262092171|gb|ACY25504.1|/1.0e-135/AcbC [Avibacterium paragallinarum]	(hyaC/wbfV/wcvB) Predicted UDP-glucose 6-dehydrogenase [Capsular polysaccharide (CVF282)] [Vibrio vulnificus CMCP6]
chr_orf01060	CQ2GL000962	Hfq	291	51.6995	94.043	0.863171	1.81903	Up	0.0251242	0.00145475	known_mRNA	K03666|1|4.9e-47|191.8|pmv:PMCN06_0983|host factor-I protein	-	-	-	gi|492012752|ref|WP_005716974.1|/3.4e-46/RNA-binding protein Hfq [Pasteurella multocida]	(Hfq)RNA-binding protein Hfq
chr_orf00418	CQ2GL000629	hhuA	2976	28.3302	54.0341	0.931531	1.9073	Up	0.0752338	0.005963	known_mRNA	K16087|1|0.0e+00|2031.5|pmp:Pmu_04000|hemoglobin/transferrin/lactoferrin receptor protein	GO:0016021//integral component of membrane;GO:0009279//cell outer membrane	GO:0004872//receptor activity;GO:0005215//transporter activity	GO:0006810//transport	gi|512748031|ref|WP_016504246.1|/0.0e+00/TonB-dependent receptor [Pasteurella multocida]	(hhuA) haemoglobin-haptoglobin binding protein HhuA [HhuA (VF0271)] [Haemophilus influenzae TN106]
chr_orf00681	CQ2GL000396	hemR	2229	123.957	240.035	0.953404	1.93644	Up	0.00769798	0.000350739	known_mRNA	K16087|1|0.0e+00|1532.3|pmul:DR93_1355|hemoglobin/transferrin/lactoferrin receptor protein	GO:0016021//integral component of membrane;GO:0009279//cell outer membrane	GO:0004872//receptor activity;GO:0005215//transporter activity	GO:0006810//transport	gi|643672909|ref|WP_025248456.1|/0.0e+00/TonB-dependent receptor [Pasteurella multocida]	(hemR) hemin receptor [Heme biosynthesis (CVF506)] [Haemophilus influenzae Rd KW20]
chr_orf01370	CQ2GL001241	hitA	1014	2259.1	3377.03	0.58001	1.49486	Up	0.190298	0.0236031	known_mRNA	K02012|1|2.0e-164|583.6|hsm:HSM_1250|iron(III) transport system substrate-binding protein	-	GO:0046872//metal ion binding	-	gi|557250988|gb|ESQ73055.1|/7.4e-189/iron ABC transporter substrate-binding protein [Pasteurella multocida subsp. multocida P1062]	(hitA) extracellular solute-binding protein family 1 [Haemophilus iron transport locus (CVF501)] [Haemophilus somnus 2336]
chr_orf00495	CQ2GL000565	sitB	894	130.505	201.482	0.62655	1.54387	Up	0.084774	0.00675939	known_mRNA	K11607|1|6.6e-135|485.3|aap:NT05HA_0396|manganese/iron transport system ATP-binding protein	-	GO:0016887//ATPase activity;GO:0005524//ATP binding	-	gi|499209085|ref|WP_010906625.1|/2.2e-165/iron ABC transporter permease [Pasteurella multocida]	(sitB) ABC Mn+2/Fe+2 transporter, ATPase subunit SitB [Iron/managanease transport (CVF459)] [Escherichia coli APEC O1]
chr_orf00493	CQ2GL000567	sitD	840	19.7545	44.2078	1.16212	2.23786	Up	0.0171863	0.000954341	known_mRNA	K11606|1|1.6e-114|417.5|aaz:ADJ80_06540|manganese/iron transport system permease protein	GO:0005886//plasma membrane;GO:0016021//integral component of membrane	GO:0042626//ATPase activity, coupled to transmembrane movement of substances;GO:0005524//ATP binding	GO:0055085//transmembrane transport	gi|499209084|ref|WP_010906624.1|/4.6e-152/iron ABC transporter permease [Pasteurella multocida]	(sitD) iron ABC transporter permease
chr_orf01273	CQ2GL001149	pvuB	897	48.4351	78.5521	0.697598	1.6218	Up	0.140053	0.01356	known_mRNA	K02016|1|5.8e-163|578.6|pmv:PMCN06_1172|iron complex transport system substrate-binding protein	-	-	-	gi|492019874|ref|WP_005720199.1|/4.0e-162/iron siderophore-binding protein [Pasteurella multocida]	(pvuB) iron-dicitrate transporter substrate-binding subunit [vibrioferrin (IA038)] [Vibrio parahaemolyticus RIMD 2210633]
chr_orf01381	CQ2GL001251	hutZ	555	28.1127	133.673	2.24942	4.7549	Up	2.19444e-10	1.14565e-12	known_mRNA	K07226|1|6.2e-99|365.2|pmul:DR93_2037|heme iron utilization protein	-	GO:0004733//pyridoxamine-phosphate oxidase activity;GO:0010181//FMN binding	GO:0042823//pyridoxal phosphate biosynthetic process;GO:0055114//oxidation-reduction process	gi|643673814|ref|WP_025248507.1|/1.3e-99/pyridoxamine 5'-phosphate oxidase [Pasteurella multocida]	(hutZ) heme iron utilization protein [direct heme uptake system (IA062)] [Aeromonas salmonicida subsp. salmonicida A449]
chr_orf01252	CQ2GL001132	lpxC	918	271.39	359.227	0.404527	1.32365	Up	0.269338	0.046658	known_mRNA	K02535|1|5.7e-158|562.0|hit:NTHI1312|UDP-3-O-[3-hydroxymyristoyl] N-acetylglucosamine deacetylase [EC:3.5.1.108]	-	GO:0008759//UDP-3-O-[3-hydroxymyristoyl] N-acetylglucosamine deacetylase activity;GO:0046872//metal ion binding;GO:0103117//UDP-3-O-acyl-N-acetylglucosamine deacetylase activity	GO:0009245//lipid A biosynthetic process	gi|980943423|ref|WP_059367128.1|/2.2e-160/UDP-3-O-[3-hydroxymyristoyl] N-acetylglucosamine deacetylase [[Pasteurella] pneumotropica]	(lpxC) UDP-3-O-(R-3-hydroxymyristoyl)-N-acetylglucosamine deacetylase [LOS (CVF494)] [Haemophilus influenzae Rd KW20]
chr_orf00564	CQ2GL000504	wecA	1074	20.3948	36.1916	0.827455	1.77455	Up	0.210889	0.029413	known_mRNA	K02851|1|1.9e-176|623.6|hpr:PARA_17320|UDP-GlcNAc:undecaprenyl-phosphate/decaprenyl-phosphate GlcNAc-1-phosphate transferase [EC:2.7.8.33 2.7.8.35]	GO:0009276//Gram-negative-bacterium-type cell wall;GO:0005887//integral component of plasma membrane	GO:0008963//phospho-N-acetylmuramoyl-pentapeptide-transferase activity;GO:0030145//manganese ion binding;GO:0000287//magnesium ion binding;GO:0016757//transferase activity, transferring glycosyl groups;GO:0036380	GO:0071555//cell wall organization;GO:0044038//cell wall macromolecule biosynthetic process;GO:0009243//O antigen biosynthetic process	gi|492114005|ref|WP_005751351.1|/1.5e-200/undecaprenyl-phosphate alpha-N-acetylglucosaminyl 1-phosphate transferase [Pasteurella multocida]	(wecA) undecaprenyl-phosphate alpha-N-acetylglucosaminyltransferase [LOS (CVF494)] [Haemophilus influenzae Rd KW20]
chr_orf01285	CQ2GL001158	lpcA	612	27.7578	55.5551	1.00103	2.00142	Up	0.028906	0.00176975	known_mRNA	K03271|1|7.8e-111|404.8|pmp:Pmu_11910|D-sedoheptulose 7-phosphate isomerase [EC:5.3.1.28]	GO:0005737//cytoplasm	GO:0030246//carbohydrate binding;GO:0008968//D-sedoheptulose 7-phosphate isomerase activity;GO:0008270//zinc ion binding	GO:2001061;GO:0009244//lipopolysaccharide core region biosynthetic process	gi|356597357|gb|AET16083.1|/5.4e-110/phosphoheptose isomerase [Pasteurella multocida 36950]	(lpcA/gmhA) phosphoheptose isomerase [LOS (CVF494)] [Haemophilus influenzae Rd KW20]
chr_orf01768	CQ2GL001580	algU	576	86.1094	141.108	0.712557	1.63871	Up	0.0331853	0.00218925	known_mRNA	K03088|1|2.4e-101|373.2|pmu:PM1789|RNA polymerase sigma-70 factor, ECF subfamily	-	GO:0003700//transcription factor activity, sequence-specific DNA binding;GO:0003677//DNA binding;GO:0016987//sigma factor activity	GO:0006355//regulation of transcription, DNA-templated;GO:0006352//DNA-templated transcription, initiation	gi|492124959|ref|WP_005755383.1|/1.6e-100/RNA polymerase sigma factor RpoE [Pasteurella multocida]	(algU) alginate biosynthesis protein AlgZ/FimS [Alginate (VF0091)] [Pseudomonas aeruginosa PAO1]
